# Supplementary material
Source: PubMed Central journal article supplement (PMC3593153)
Supplement: neo1503_0305SD1.pdf [file neo1503_0305SD1.pdf]

**Table W1.** Relationship between Expression of *Bcl-2* and *Bax* mRNAs and Sex, Age, and T and N Stages.

|                               | Bcl-2/Bax      | Bcl-2 | Bax  |
|-------------------------------|----------------|-------|------|
|                               | <i>P</i> value |       |      |
| Male <i>versus</i> female     | .185           | .350  | .985 |
| Age                           | .866           | .744  | .806 |
| T1 + T2 <i>versus</i> T3 + T4 | .233           | .774  | .869 |
| N(-) <i>versus</i> N(+)       | .324           | .609  | .130 |

The relationships of *Bcl-2/Bax*, *Bcl-2*, and *Bax* with sex and TN classification were performed using Student's two-tailed *t* test.

Correlations between *Bcl-2/Bax*, *Bcl-2*, and *Bax* and age were examined by Spearman's rank correlation coefficient and regression calculation.
